# Supplementary material for: A Neural Network Approach to Identify Glioblastoma Progression Phenotype from Multimodal MRI
Source: MDPI journal article supplement (doi:10.3390/cancers13092006), 2021-04-21
Supplement: s1 [file s1]

# Supplementary Material: A Neural Network Approach to Identify Glioblastoma Progression Phenotype from Multimodal MRI

Jiun-Lin Yan, Cheng-Hong Toh, Li Ko, Kuo-Chen Wei and Pin-Yuan Chen

## Text S1: MR Imaging Processing

Reposition and reorientation of the images were done prior to the imaging processing.

### 1. Brain Extraction

Brain extraction by using FMRIB Software Library (FSL) function (“bet”) was automatically followed by manual correction [1] with the following script: bet <input> <output> -f 0.05 -m

### 2. DTI Imaging Processing and DTI analysis

DTI images were processed using FSL version 5.0.0 ([www.fmrib.ox.ac.uk/fsl](http://www.fmrib.ox.ac.uk/fsl)) [2]. Eddy current can occur nearby the conductor whenever magnetic field changes. This effect can cause unwilling stretch or shearing of the images due to the changing of the magnetic field. The effect of eddy current depends on the rate of changes of the magnetic field, therefore in DTI which uses the fast echo-planner imaging can commonly have this artifact. Therefore, eddy current correction is needed before processing by using “eddy\_correct” function in FSL FMRIB’s diffusion toolbox (FDT).

- Eddy current correction: eddy\_correct DTI.nii data 0
- Manual correction brain extraction with fslview: output: DTI\_brain\_mask\_m
- Create binary mask for further calculation
- Fslmaths DTI\_brain\_mask\_m.nii.gz -div DTI\_brain\_mask\_m.nii.gz DTI\_brain\_mask\_m\_bin.nii.gz
- Create extracted brain with manual corrected mask: fslmaths DTI.nii -mul DTI\_brain\_mask\_m\_bin.nii.gz DTI\_brain\_m.nii.gz
- DTI analysis: dtifit -k data -m DTI\_brain\_m -r DTI.bvecs -b DTI.bvals -o dti

Further DTI parameters were then calculated by using FSL “dtifit” function. Outputs of the DTI processing include:

FA Fractional anisotropy  
L1, L2, L3 the tensor eigenvalue (magnitude)  
MD Mean diffusivity  
MO Mode of the anisotropy  
SO raw T2 signal with no diffusion weighting (b0)  
V1, V2, V3 the tensor eigenvector

ADC was generated directly from scanner with an inline calculation, utilizing b-values 0–1000. Further calculation of the p and q were proceeded by using “fslmaths” function under FSL terminal with the below equation as described previously [3].

$$p = MD \times 1.732 \quad (1)$$

$$q = \sqrt{(\lambda_1 - D) \times 2 + (\lambda_2 - D) \times 2 + (\lambda_3 - D) \times 2} \quad (2)$$

Create different maps

```
fslmaths dti_MD -mul 1.732 DTI_p
fslmaths dti_L1 -sub dti_MD -sqr DTI_L1diff
fslmaths dti_L2 -sub dti_MD -sqr DTI_L2diff
fslmaths dti_L3 -sub dti_MD -sqr DTI_L3diff
fslmaths dti_L1diff -add dti_L2diff -add dti_L3diff -sqrt DTI_q
```

### 3. Imaging Coregistration

All MRI data were coregistered to pre-operative T1 with contrast MRI. Images coregistrations were done by using "FLIRT" function in FSL with the following script. within the same scan time point between different sequences. `flirt -ref <reference image> -in <input images> -out <output of FLIRT> -omat <reference transformation> -cost normmi -searchrx -90 90 -searchry -90 90 -searchrz -90 90 -dof 12 -interp trilinear`

### 4. Definition of the ROIs and the progression patterns

ROIs was defined by the contrast enhanced lesion of the pre-operative MRI. This manual selected ROIs were done by using 3D slicer (<http://www.slicer.org>) [4]

**Table S1.** Radiomics features.

| 1st order (18)                 | Shape (13)                | GLCM (23)           | GLDM (14)                                 | GLRLM (16)                           | GLSZM (16)                           | NGTDM (5)  |
|--------------------------------|---------------------------|---------------------|-------------------------------------------|--------------------------------------|--------------------------------------|------------|
| Interquartile Range            | Maximum 3D Diameter       | Joint Average       | Gray Level Variance                       | Short Run Low Gray Level Emphasis    | Gray Level Variance                  | Coarseness |
| Skewness                       | Maximum 2D Diameter Slice | Sum Average         | High Gray Level Emphasis                  | Gray Level Variance                  | Zone Variance                        | Complexity |
| Uniformity                     | Sphericity                | Joint Entropy       | Dependence Entropy                        | Low Gray Level Run Emphasis          | Gray Level Non-Uniformity Normalized | Strength   |
| Median                         | Minor Axis                | Cluster Shade       | Dependence Non-Uniformity                 | Gray Level Non-Uniformity Normalized | Size Zone Non-Uniformity Normalized  | Contrast   |
| Energy                         | Elongation                | Maximum Probability | Gray Level Non-Uniformity                 | Run Variance                         | Size Zone Non-Uniformity             | Busyness   |
| Robust Mean Absolute Deviation | Surface Volume Ratio      | Idmn                | Small Dependence Emphasis                 | Gray Level Non-Uniformity            | Gray Level Non-Uniformity            |            |
| Mean Absolute Deviation        | Volume                    | Joint Energy        | Small Dependence High Gray Level Emphasis | Long Run Emphasis                    | Large Area Emphasis                  |            |
| Total Energy                   | Major Axis                | Contrast            | Emphasis                                  | Short Run High Gray Level Emphasis   | Small Area High Gray Level Emphasis  |            |
| Maximum                        | Surface Area              | Difference Entropy  | Dependence Non-Uniformity Normalized      | Run Length Non-Uniformity            | Zone Percentage                      |            |
| Root Mean Squared              | Flatness                  | Inverse Variance    | Large Dependence Emphasis                 | Short Run Emphasis                   | Large Area Low Gray Level Emphasis   |            |
| 90 Percentile                  | Least Axis                | Difference Variance | Large Dependence Low Gray Level Emphasis  | Long Run High Gray Level Emphasis    | Large Area High Gray Level Emphasis  |            |
| Minimum                        | Maximum 2D Diameter       | Idn                 | Emphasis                                  | Run Percentage                       | High Gray Level Zone Emphasis        |            |
| Entropy                        | Column                    | Idm                 | Dependence Variance                       | Long Run Low Gray Level Emphasis     | Small Area Emphasis                  |            |
| Range                          | Maximum 2D Diameter Row   | Correlation         | Large Dependence High Gray Level Emphasis | Run Entropy                          | Low Gray Level Zone Emphasis         |            |
| Variance                       |                           | Autocorrelation     | Emphasis                                  | High Gray Level Run Emphasis         | Zone Entropy                         |            |
| Kurtosis                       |                           | Sum Entropy         | Small Dependence Low Gray Level Emphasis  | Run Length Non-Uniformity            | Small Area Low Gray Level Emphasis   |            |
| Mean                           |                           | Sum Squares         | Emphasis                                  | Normalized                           |                                      |            |
|                                |                           | Cluster Prominence  | Low Gray Level Emphasis                   |                                      |                                      |            |
|                                |                           | Imc2                |                                           |                                      |                                      |            |
|                                |                           | Imc1                |                                           |                                      |                                      |            |
|                                |                           | Difference Average  |                                           |                                      |                                      |            |
|                                |                           | Id                  |                                           |                                      |                                      |            |
|                                |                           | Cluster Tendency    |                                           |                                      |                                      |            |

## References:

1. Smith, S.M. Fast robust automated brain extraction. *Hum. Brain Mapp.* **2002**, *17*, 143–155, doi:10.1002/hbm.10062.
2. Jenkinson, M.; Beckmann, C.F.; Behrens, T.E.; Woolrich, M.W.; Smith, S.M. FSL. *NeuroImage* **2012**, *62*, 782–790, doi:10.1016/j.neuroimage.2011.09.015.
3. Peña, A.; Green, H.A.L.; A Carpenter, T.; Price, S.J.; Pickard, J.D.; Gillard, J.H. Enhanced visualization and quantification of magnetic resonance diffusion tensor imaging using thep:qtensor decomposition. *Br. J. Radiol.* **2006**, *79*, 101–109, doi:10.1259/bjr/24908512.
4. Fedorov, A.; Beichel, R.; Kalpathy-Cramer, J.; Finet, J.; Fillion-Robin, J.-C.; Pujol, S.; Bauer, C.; Jennings, M.; Fennessy, F.; Sonka, M.; et al. 3D Slicer as an image computing platform for the Quantitative Imaging Network. *Magn. Reson. Imaging* **2012**, *30*, 1323–1341, doi:10.1016/j.mri.2012.05.001.
